# Supplementary material
Source: PubMed Central journal article supplement (PMC6641321)
Supplement: ao7b01805_si_001.pdf [file ao7b01805_si_001.pdf]

**Hydrogen-Bonding Interactions in Pyridinium-Based Ionic Liquids and  
Dimethyl Sulfoxide Binary Systems: A Combined Experimental and  
Computational Study**

Yaqin Zhang<sup>†</sup>, Hongyan He<sup>†,‡,\*</sup>, Suojiang Zhang<sup>†,\*</sup> and Maohong Fan<sup>‡</sup>

<sup>†</sup> *Beijing Key Laboratory of Ionic Liquids Clean Process, Key Laboratory of Green Process and Engineering, State Key Laboratory of Multiphase Complex Systems, Institute of Process Engineering, Chinese Academy of Sciences, Beijing 100190, China*

<sup>‡</sup> *Department of Chemical and Petroleum Engineering, University of Wyoming, Laramie, Wyoming 82071, United States*

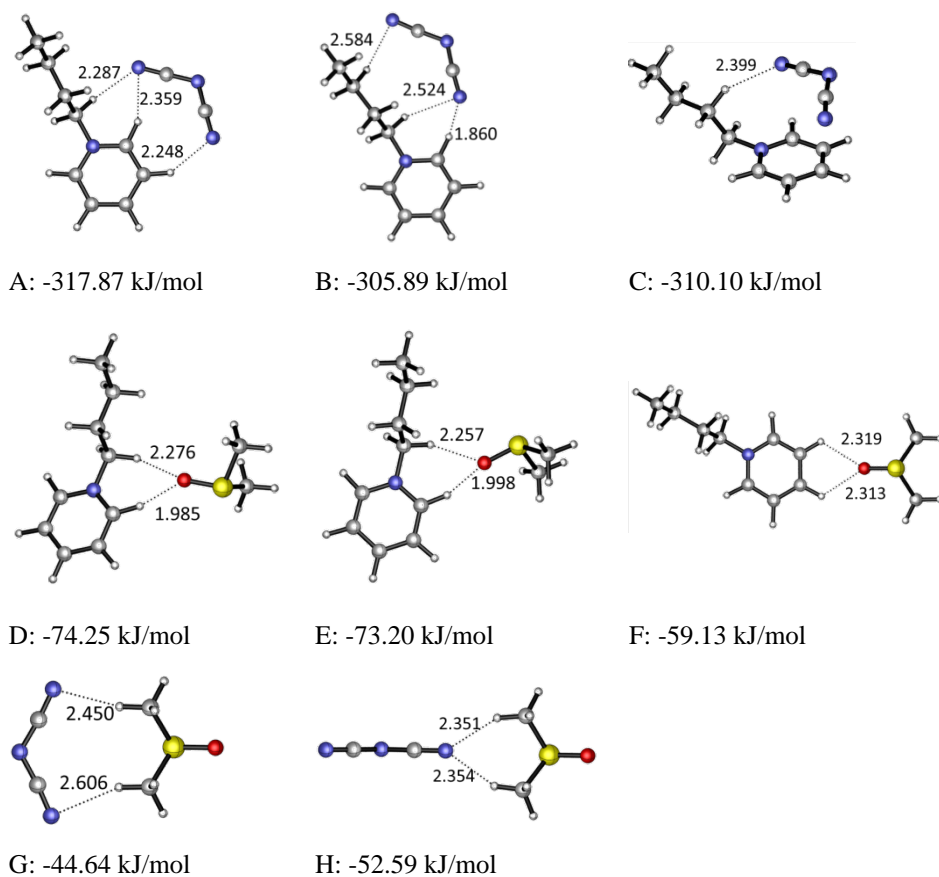

**Figure S1.** Structures of ion pairs (A, B, C), [Bpy]<sup>+</sup>-DMSO (D, E, F), and [DCA]<sup>-</sup>-DMSO (G, H) optimized at the B3LYP/6-31++g(d, p) level. The H-bonds are marked with dashed lines and the corresponding bond lengths are labeled in angstrom.

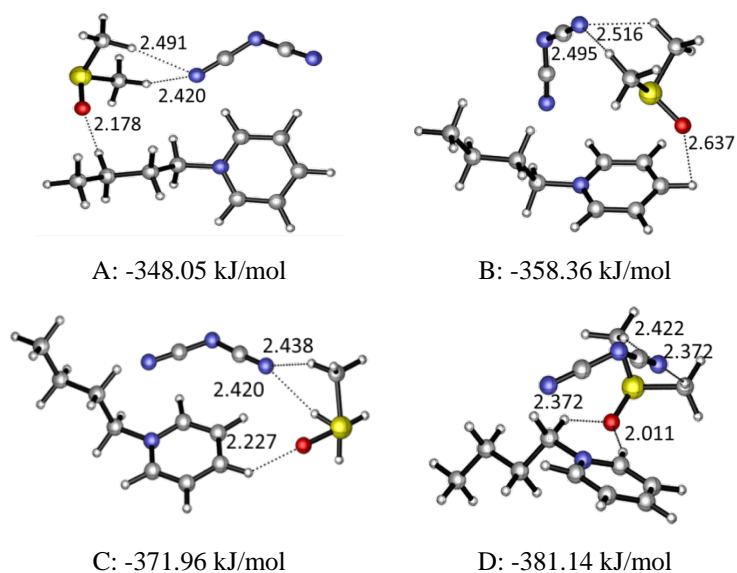

**Figure S2.** The possible geometries and interaction energies of [Bpy][DCA]-DMSO optimized at the level of B3LYP/6-31++g(d, p). The H-bonds are marked with dash lines and the corresponding H $\cdots$ N and H $\cdots$ O distances are labeled in angstroms.

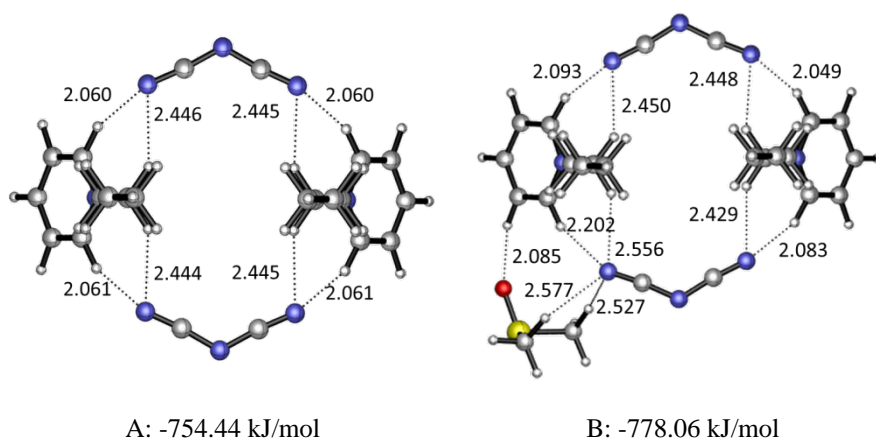

**Figure S3.** Optimized geometrics for the ion cluster (A, 2[Bpy]<sup>+</sup>-2[DCA]<sup>-</sup>) and for one DMSO molecule interacting with the ion cluster (B, 2[Bpy]<sup>+</sup>-2[DCA]<sup>-</sup>-DMSO). H-bonds between cations and anions, and between DMSO and ion pairs, are denoted by dash lines, and the corresponding H<sup>⋯</sup>N and H<sup>⋯</sup>O distances are label in angstrom.

**Table S1.** Properties of electron density at bond critical point (BCP) for the ion clusters (a.u.).

| H-bonds                  | Figure S3 A: 2[Bpy] <sup>+</sup> -2[DCA] <sup>-</sup> |                     |                             | Figure S3 B: 2[Bpy] <sup>+</sup> -2[DCA] <sup>-</sup> -DMSO |                     |                             |
|--------------------------|-------------------------------------------------------|---------------------|-----------------------------|-------------------------------------------------------------|---------------------|-----------------------------|
|                          | Length                                                | $\rho_{\text{BCP}}$ | $\nabla^2\rho_{\text{BCP}}$ | Length                                                      | $\rho_{\text{BCP}}$ | $\nabla^2\rho_{\text{BCP}}$ |
| C5-H11 <sup>⋯</sup> N57  | 2.061                                                 | 0.023               | 0.066                       | 2.083                                                       | 0.022               | 0.064                       |
| C12-H14 <sup>⋯</sup> N57 | 2.444                                                 | 0.011               | 0.035                       | 2.429                                                       | 0.012               | 0.035                       |
| C30-H37 <sup>⋯</sup> N58 | 2.061                                                 | 0.023               | 0.066                       | 2.202                                                       | 0.017               | 0.051                       |
| C41-H42 <sup>⋯</sup> N58 | 2.445                                                 | 0.011               | 0.001                       | 2.556                                                       | 0.009               | 0.028                       |
| C34-H40 <sup>⋯</sup> N28 | 2.060                                                 | 0.023               | 0.066                       | 2.093                                                       | 0.021               | 0.062                       |
| C41-H43 <sup>⋯</sup> N28 | 2.445                                                 | 0.011               | 0.035                       | 2.450                                                       | 0.011               | 0.035                       |
| C1-H8 <sup>⋯</sup> N29   | 2.060                                                 | 0.023               | 0.066                       | 2.049                                                       | 0.023               | 0.068                       |
| C12-H13 <sup>⋯</sup> N29 | 2.446                                                 | 0.011               | 0.035                       | 2.448                                                       | 0.011               | 0.035                       |
| C60-H63 <sup>⋯</sup> N58 |                                                       |                     |                             | 2.527                                                       | 0.009               | 0.025                       |
| C64-H66 <sup>⋯</sup> N58 |                                                       |                     |                             | 2.577                                                       | 0.281               | -1.017                      |
| C31-H38 <sup>⋯</sup> O68 |                                                       |                     |                             | 2.085                                                       | 0.018               | 0.060                       |

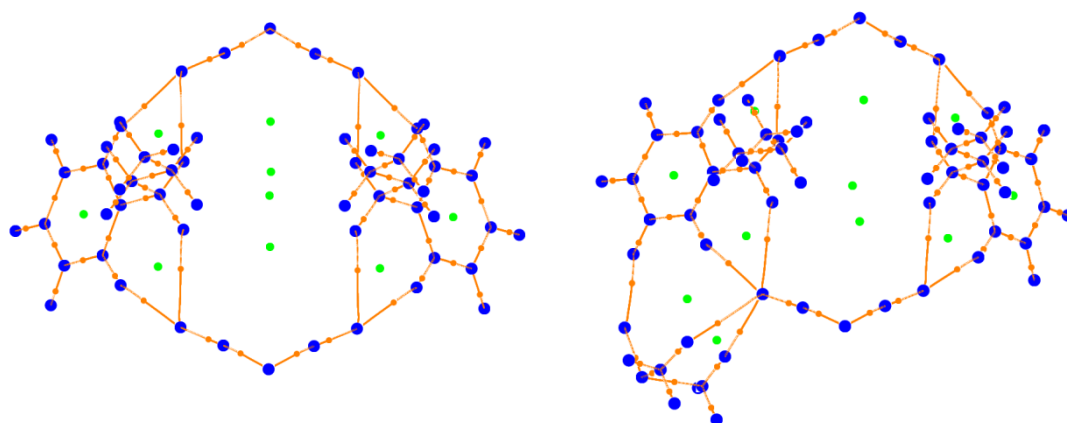

A: 2[Bpy]<sup>+</sup>-2[DCA]<sup>-</sup>

B: 2[Bpy]<sup>+</sup>-2[DCA]<sup>-</sup>-DMSO

**Figure S4.** Critical points (CPs) for ion clusters. Color legend for the atom nuclear: blue (C, H, O, N, S), bond CP: orange and ring CP: green.

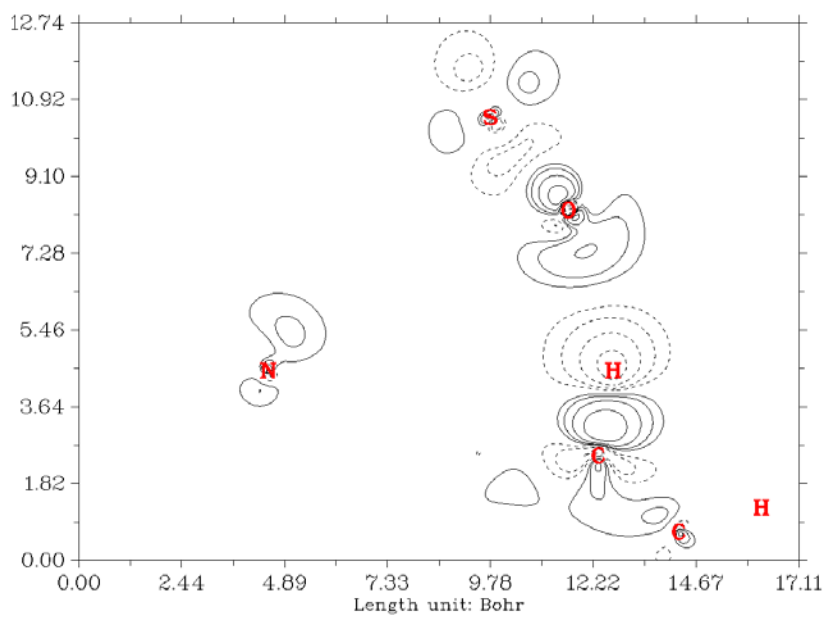

**Figure S5.** Electron density difference around the H-bond C31-H38...O68. The solid lines represent the accumulation of electrons, and the dotted lines represent the reduction of electrons.

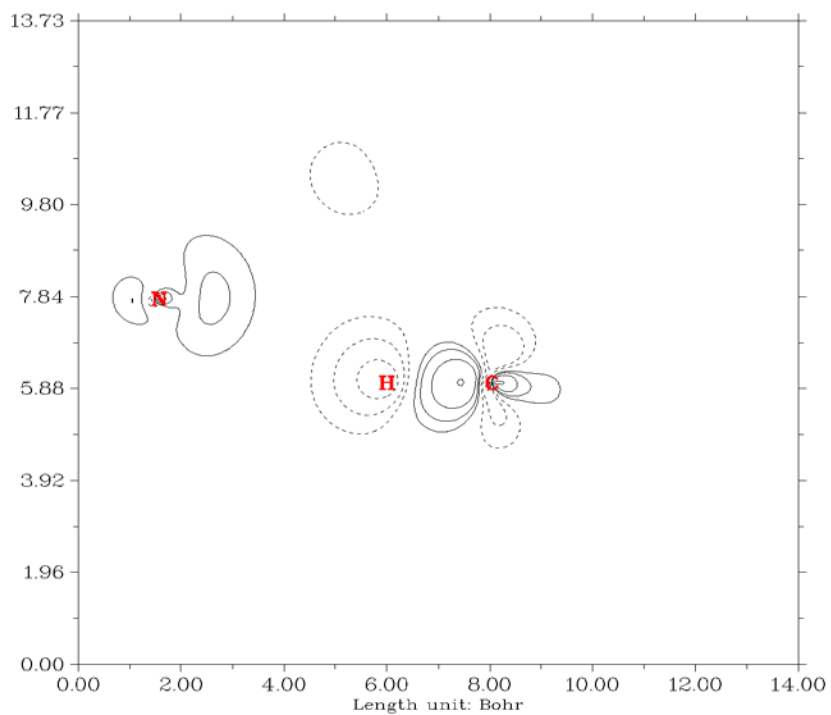

**Figure S6.** Electron density difference around the H-bond C64-H66...N58. The solid lines represent the accumulation of electrons, and the dotted lines represent the reduction of electrons.

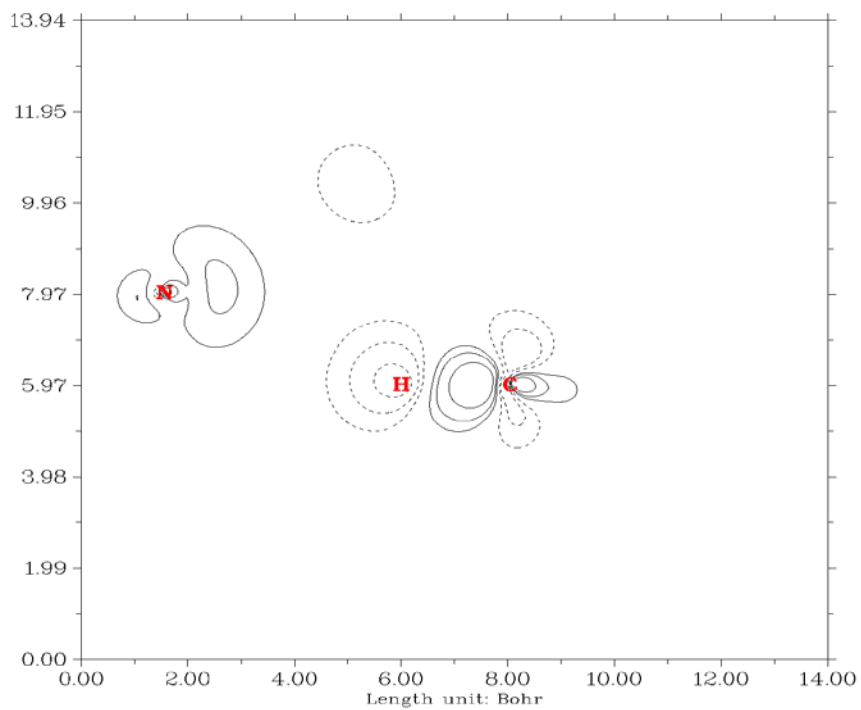

**Figure S7.** Electron density difference around the H-bond C60-H63...N58. The solid lines represent the accumulation of electrons, and the dotted lines represent the reduction of electrons.

**Table S2.** Chemical shifts of hydrogen atoms of [Bpy]<sup>+</sup> and DMSO at different molar concentrations of DMSO in [Bpy][DCA]-DMSO solutions.

| x(IL)  | x(DMSO) | H(C2,6) | H(C4) | H(C3,5) | H(C7) | DMSO  | H(C8) | H(C9) | H(C10) |
|--------|---------|---------|-------|---------|-------|-------|-------|-------|--------|
| 1.0000 | 0.0000  | 8.600   | 8.095 | 7.624   | 4.175 |       | 1.426 | 0.742 | 0.278  |
| 0.9021 | 0.0979  | 8.612   | 8.105 | 7.637   | 4.184 | 2.118 | 1.438 | 0.757 | 0.297  |
| 0.7970 | 0.2030  | 8.637   | 8.127 | 7.662   | 4.203 | 2.144 | 1.462 | 0.787 | 0.330  |
| 0.6964 | 0.3036  | 8.661   | 8.149 | 7.687   | 4.222 | 2.158 | 1.485 | 0.816 | 0.363  |
| 0.5999 | 0.4001  | 8.688   | 8.173 | 7.714   | 4.244 | 2.179 | 1.509 | 0.845 | 0.398  |
| 0.4991 | 0.5009  | 8.720   | 8.203 | 7.747   | 4.269 | 2.203 | 1.537 | 0.880 | 0.438  |
| 0.4001 | 0.5999  | 8.760   | 8.242 | 7.790   | 4.303 | 2.236 | 1.575 | 0.925 | 0.490  |
| 0.2999 | 0.7001  | 8.800   | 8.290 | 7.839   | 4.343 | 2.276 | 1.619 | 0.977 | 0.552  |
| 0.2006 | 0.7994  | 8.878   | 8.359 | 7.913   | 4.402 | 2.329 | 1.682 | 1.050 | 0.636  |
| 0.1002 | 0.8998  | 8.967   | 8.456 | 8.011   | 4.499 | 2.405 | 1.766 | 1.146 | 0.748  |
| 0.0000 | 1.0000  |         |       |         |       | 2.513 |       |       |        |

**Table S3.** Chemical shift changes of hydrogen atoms of [Bpy]<sup>+</sup> and DMSO at different molar concentrations of DMSO in [Bpy][DCA]-DMSO solutions.

| x(IL)  | x(DMSO) | H(C2,6) | H(C4) | H(C3,5) | H(C7) | DMSO   | H(C8) | H(C9) | H(C10) |
|--------|---------|---------|-------|---------|-------|--------|-------|-------|--------|
| 1.0000 | 0.0000  | 0.000   | 0.000 | 0.000   | 0.000 |        | 0.000 | 0.000 | 0.000  |
| 0.9021 | 0.0979  | 0.011   | 0.010 | 0.013   | 0.009 | -0.395 | 0.012 | 0.016 | 0.018  |
| 0.7970 | 0.2030  | 0.037   | 0.032 | 0.038   | 0.028 | -0.369 | 0.036 | 0.045 | 0.052  |
| 0.6964 | 0.3036  | 0.061   | 0.054 | 0.063   | 0.048 | -0.355 | 0.060 | 0.074 | 0.085  |
| 0.5999 | 0.4001  | 0.088   | 0.078 | 0.090   | 0.069 | -0.334 | 0.083 | 0.104 | 0.119  |
| 0.4991 | 0.5009  | 0.120   | 0.108 | 0.123   | 0.094 | -0.310 | 0.112 | 0.139 | 0.160  |
| 0.4001 | 0.5999  | 0.160   | 0.147 | 0.166   | 0.128 | -0.277 | 0.149 | 0.183 | 0.212  |
| 0.2999 | 0.7001  | 0.200   | 0.195 | 0.215   | 0.168 | -0.237 | 0.193 | 0.236 | 0.274  |
| 0.2006 | 0.7994  | 0.278   | 0.264 | 0.289   | 0.227 | -0.184 | 0.257 | 0.309 | 0.357  |
| 0.1002 | 0.8998  | 0.367   | 0.361 | 0.387   | 0.324 | -0.108 | 0.341 | 0.404 | 0.469  |
| 0.0000 | 1.0000  |         |       |         |       | 0.000  |       |       |        |

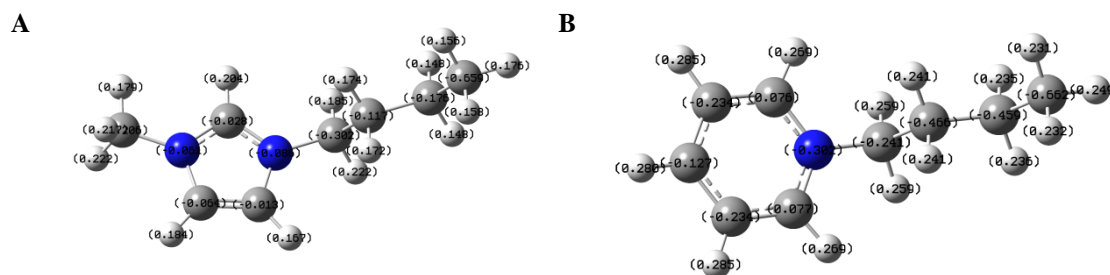

**Figure S8.** Natural population analysis charges of A: [Bmim]<sup>+</sup> and B: [Bpy]<sup>+</sup> cations.
